# Supplementary material for: Genomic Epidemiology of Methicillin-Resistant Staphylococcus aureus in a Neonatal Intensive Care Unit
Source: PubMed Central journal article supplement (PMC5061378; doi:10.1371/journal.pone.0164397), 2016-10-12

A

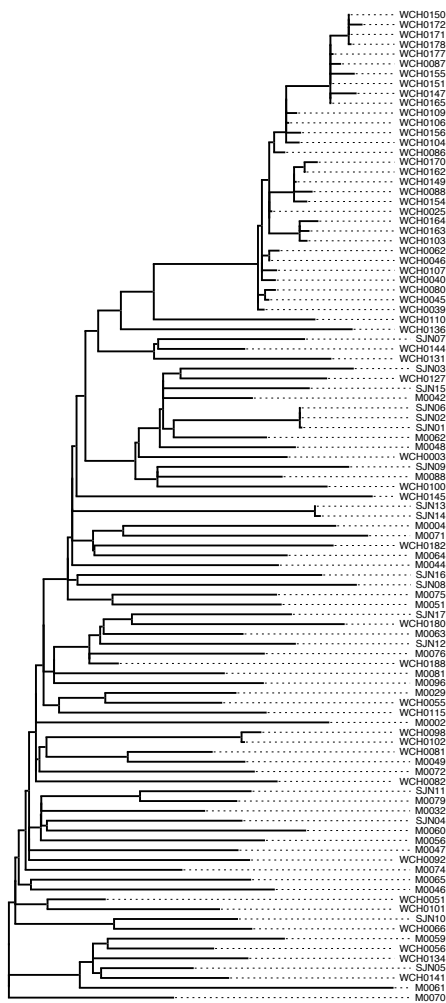

B

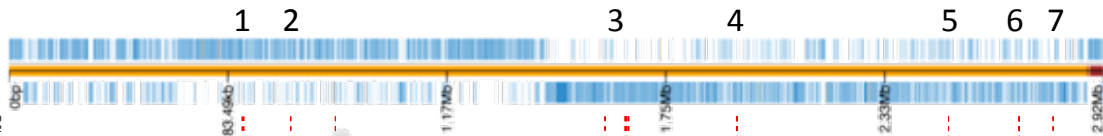

C

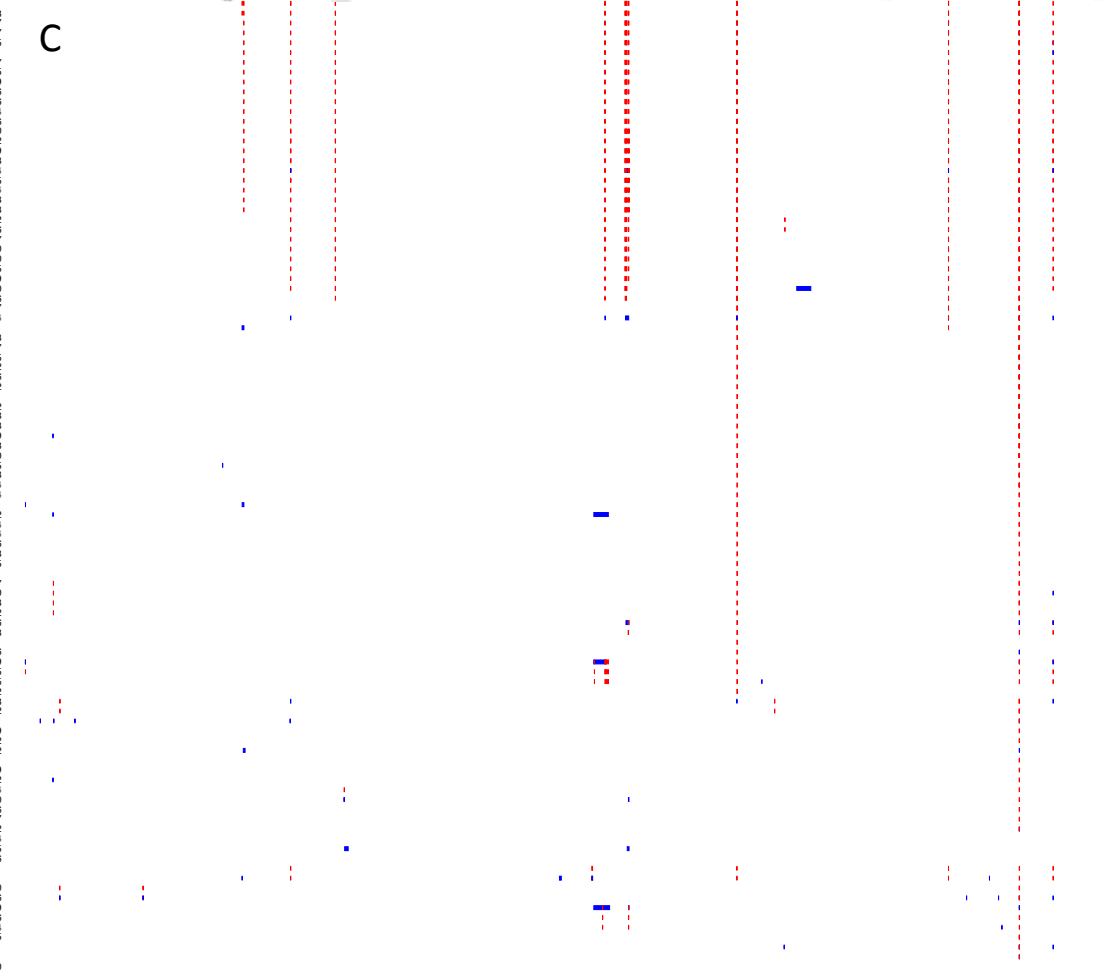

Supplement: pone.0164397.s018.pdf [file pone.0164397.s018.pdf]
