# Supplementary material for: Genomic Epidemiology of Methicillin-Resistant Staphylococcus aureus in a Neonatal Intensive Care Unit
Source: PubMed Central journal article supplement (PMC5061378; doi:10.1371/journal.pone.0164397), 2016-10-12
Supplement: pone.0164397.s020.pdf [file pone.0164397.s020.pdf]

A

WCH0088  
 WCH0154  
 WCH0149  
 WCH0162  
 WCH0170  
 WCH0025  
 WCH0086  
 WCH0103  
 WCH0163  
 WCH0164  
 WCH0087  
 WCH0147  
 WCH0151  
 WCH0165  
 WCH0177  
 WCH0155  
 WCH0104  
 WCH0109  
 WCH0106  
 WCH0156  
 WCH0150  
 WCH0171  
 WCH0178  
 WCH0172  
 WCH0039  
 WCH0045  
 WCH0080  
 WCH0040  
 WCH0046  
 WCH0062  
 WCH0107  
 WCH0110  
 WCH0003  
 WCH0100  
 WCH0127  
 WCH0051  
 WCH0101  
 WCH0056  
 WCH0066  
 WCH0055  
 WCH0180  
 WCH0188  
 WCH0115  
 WCH0092  
 WCH0098  
 WCH0102

B

WCH0001  
 WCH0049  
 WCH0074  
 WCH0096  
 WCH0097  
 WCH0053  
 WCH0079  
 WCH0183  
 WCH0059  
 WCH0064  
 WCH0119  
 WCH0148  
 WCH0013  
 WCH0014  
 WCH0052  
 WCH0063  
 WCH0065  
 WCH0070  
 WCH0071  
 WCH0186  
 WCH0072  
 WCH0077  
 WCH0076  
 WCH0078  
 WCH0073  
 WCH0032  
 WCH0099  
 WCH0085  
 WCH0093  
 WCH0112  
 WCH0120  
 WCH0091  
 WCH0129  
 WCH0168  
 WCH0084  
 WCH0113  
 WCH0116  
 WCH0128
